# Supplementary material
Source: PubMed Central journal article supplement (PMC5360910)
Supplement: rspb20161679supp1.pdf [file rspb20161679supp1.pdf]

## Supplementary materials

### Characteristics of *H. physophora* and *Allomerus* populations

The *H. physophora* populations studied differed in the ratio of their associated ant species, ranging from 100% of the plants inhabited by *A. octoarticulatus* in Camp Patawa, 60% in Saül, 20% in Fourgassier, and 15% in the Montagne des Singes whereas 100% of the plants in Petit Saut were inhabited by *A. decemarticulatus*. These ratios were obtained from a non-destructive census of the ant species inhabiting the *H. physophora* in the above-mentioned areas, regardless of plant size and ant colony developmental stage, except for founding queens and incipient colonies.

### Molecular phylogeny of *Allomerus* ants

#### Methods

Total DNA was extracted from ant workers. Each ant worker was incubated overnight at 55°C in 10 µL of Proteinase K solution (Qiagen) and 150 µL of 10% Chelex solution (BioRad, Marnes-la-Coquette, France). We used 2 µL of the solution obtained to amplify fragments of the cytochrome c oxydase subunit I (COI) and the cytochrome *b* (*cyt b*) genes in two different PCR.

We amplified a segment of the COI with primers LCO1490 and HCO2198 [1] and a segment of the *cyt b* gene with primers CB1 and tR<sup>S</sup> or CB2 [2, 3]. PCR products were sequenced by Millegen (Labège, France). In addition, individuals from four Solenopsidini species were used as outgroups: *Monomorium subopacum* collected in *El Puerto de Santa María*, Cádiz (Spain), and *Diplorhoptrum* sp., *Solenopsis saevissima* and *Wasmannia auropunctata* collected in *Petit Saut* (French Guiana). The sequences are available at GenBank through accession numbers KX585770-KX585863.

The sequences were edited, aligned and concatenated using Geneious v9.1.5 (<http://www.geneious.com>) [4]. The alignment was performed using MAFFT v1.3.5 [5] as implemented in Geneious. The final alignment consisted of 56 sequences and was 1,594-bases long. Phylogenetic reconstruction was performed by maximum likelihood inference (ML) using the GTRGAMMA substitution model in the RAxML software [6]. The best-scoring ML tree was selected after 50 iterations. Branch support for the topology was assessed by bootstrapping the original data; the autoMRE automatic bootstopping criterion resulted in 850 replicates.

35

36 Results

37 The *Allomerus* clade was monophyletic in the context of the outgroup species  
 38 provided. We identified four very well supported clades corresponding to four of the  
 39 five species/subspecies studied; *A. dentatus*, which was represented by only one  
 40 individual, was basal to these four clades. *Allomerus decemarticulatus* individuals  
 41 were grouped as a monophyletic clade, basal to *Allomerus septemarticulatus*;  
 42 *A. octoarticulatus* and *A. octoarticulatus* var. *demerarae* were grouped together. The  
 43 three *A. septemarticulatus* individuals were in their own monophyletic clade, basal to  
 44 *A. octoarticulatus sensu lato*. Finally, *A. octoarticulatus* and *A. octoarticulatus* var.  
 45 *demerarae* were almost perfectly divided into two separate monophyletic sister-  
 46 clades. Geographical origin and host-plant species did not seem to influence the  
 47 phylogenetic grouping for *A. octoarticulatus*.

48

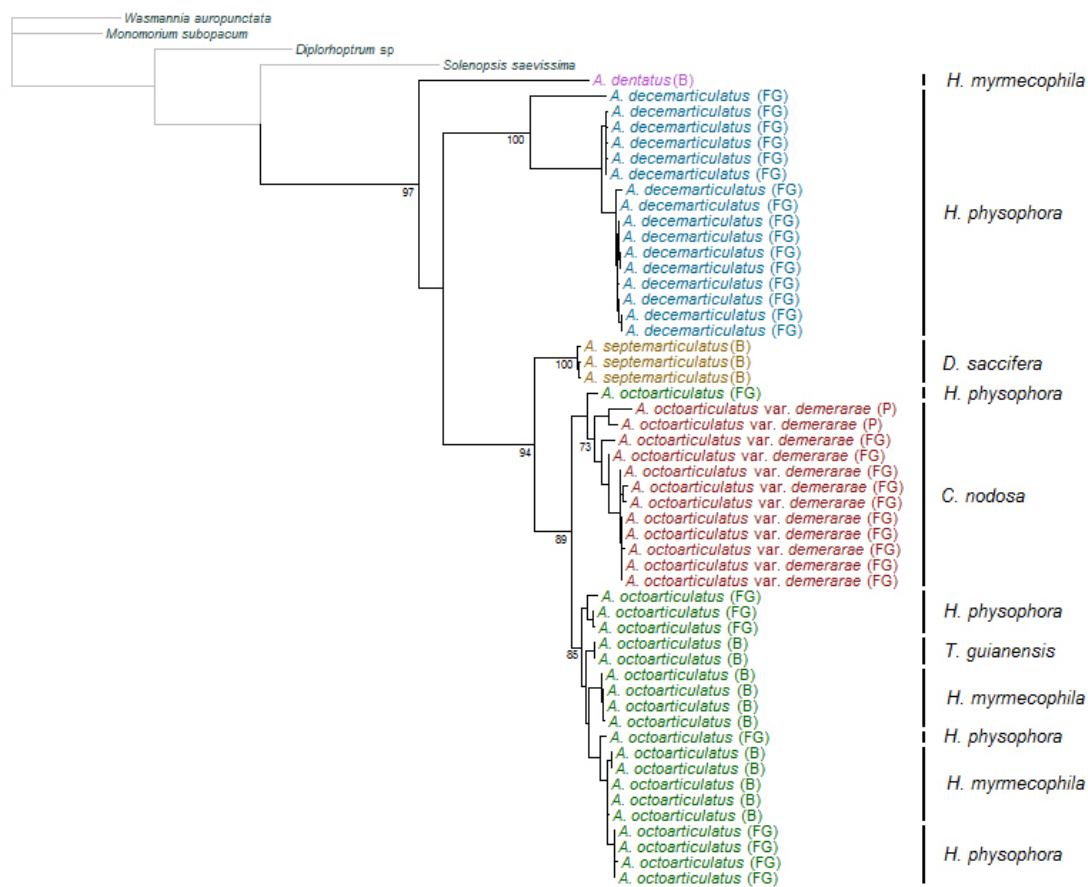

49 **Figure S1.** Partial phylogeny of the *Allomerus* genus based on cyt *b* and COI mtDNA  
 50 sequences (1060 bp). Bootstrap values above 50% are indicated for each branch. Each  
 51 ant species is highlighted in a different color and followed by its area of origin [Brazil  
 52 (B), Peru (P), French Guiana (FG)] and the identity of its associated host plant.

53

## 54 **Chemical basis of biotic protection**

### 55 Methods

56 We collected *Allomerus* workers from several colonies (not mixed) and *H.*  
57 *physophora* leaves from different trees than those sheltering the collected ants in the  
58 morning for behavioral experiments to be conducted in the afternoon. Because it has  
59 been shown that nurses responded differently to leaf tissue extracts [7, 8], only  
60 patrolling workers were collected with a mouth aspirator. Once transported to the  
61 laboratory, they were provided with water and honey and kept in small vials (h=70  
62 mm; Ø=30 mm) until their use in the afternoon.

63 Four types of leaves were collected according to the stages described in  
64 Grangier *et al.* [9]. Juvenile leaves (hereafter, young leaves) were collected whole  
65 whereas well-developed leaves (stage 2-4) were cut off leaving the domatia on the  
66 tree to avoid collecting ants with the leaf. Leaves were individually placed in plastic  
67 bags for transport to the laboratory where the patrolling ants were carefully removed.  
68 Less than 1 hour after the leaves were collected in the field, their compounds were  
69 extracted by soaking them in a hexane bath for 30 min to obtain volatile surface and  
70 primary compounds [10, 11]. Young leaves were soaked in a 4 ml vial (15x45 mm)  
71 filled with hexane, only the cut petiole remaining out of the solvent bath. Older leaves  
72 (stage 2-4) were soaked in a 22 ml vial (23x84 mm) with 4 ml of hexane with only a  
73 part of the tip of the leaves soaking in the solvent to obtain approximately the same  
74 surface area of washed leaf as for the young leaves. For each extract, three leaves  
75 from three different trees were consecutively soaked in the same hexane bath. After  
76 each leaf, hexane was added to ensure a volume of 4 ml because of partial evaporation  
77 or absorption by the trichomes. Extracts were kept at -20°C until their use in the  
78 afternoon.

79 The isolation of active compounds involved in the induction of the patrolling  
80 behavior was performed *via* the fractionation of crude extracts to the compounds'  
81 polarity on a silica gel column (2 cm, 70-230 mesh, 60 Å). Elution was carried out  
82 successively with 4 ml of hexane, 1 ml of dichloromethane and 4 ml of methanol.  
83 Fractions were dried under nitrogen and re-dissolved in 4 ml of hexane for bioassays.

84 The chemical analysis of leaf tissue extracts and fractions was conducted  
85 through Gas Chromatography-Mass Spectrometry (GC-MS) with a Varian 450-GC

86 coupled to a MS240 ion-trap mass spectrometer. The entire system was operated by  
87 using the Varian MS workstation data system, version 6.9.2. MS spectra were  
88 recorded over a mass range of 50-650 mass units with two scans per second. An  
89 aliquot of 1  $\mu$ l was injected in splitless mode with an injector temperature of 250°C, a  
90 detector temperature of 300°C and a manifold temperature of 300°C. An apolar  
91 Varian factorFourVF-5MS capillary column (30m, 0.25mm i.d., 0.25  $\mu$ m film  
92 thickness, 5% diphenyl and 95% dimethylpolysiloxane) was used. Elution was carried  
93 out with helium at 1 ml/min. The oven temperature was programmed as follows: 60°C  
94 for 2 min, 60 to 280°C at 15°C/min, 280 to 320°C at 10°C/min and left at 320°C for  
95 10 min. Identifications were processed with spectral databases and with a series of  
96 standard linear alkanes. Standards of compounds of interest were injected for control.

97 Behavioral tests were performed in a neutral arena (Petri dish; 90mm in  
98 diameter and 10mm deep) whose walls were coated with Fluon® to prevent the ants  
99 from climbing out. Thirty workers from the same colony were placed in the arena 10  
100 min before the bioassay for acclimation. 300  $\mu$ l of extract or control solvent (hexane)  
101 were deposited on a 4 cm<sup>2</sup> piece of filter paper and allowed to evaporate during 15  
102 seconds before being introduced in the arena. The number of ants in contact with the  
103 papers were then scored every minute during 20 min as described in Edwards *et al.*  
104 [8]. Ant workers and filter papers were used only once and the arenas were cleaned  
105 with ethanol between each experiment.

106 As bioassays on the different fractions identified tocopherols as putative  
107 attractive compounds, the same bioassays were performed with synthetic  $\alpha$ -tocopherol  
108 and  $\beta$ -tocopherol (Sigma-Aldrich). Different combinations were tested: " $\alpha$ - and  $\beta$ -  
109 tocopherol", " $\alpha$ - and  $\beta$ -tocopherol+EOL" (EOL = extracts from old leaves), " $\alpha$ -  
110 tocopherol+EOL", and " $\beta$ -tocopherol+EOL". The  $\alpha$ - and  $\beta$ -tocopherol were mixed in  
111 proportions similar to the ones observed in young leaves (see Table S1).

112 The effect of each treatment on the number of ants attracted was analyzed using  
113 a repeated-measures ANOVA comparing the treatments and their respective controls  
114 using SPSS 16 software. Time (n=20) was considered as the repetition factor and the  
115 number of ants was  $\sqrt{(x+0.5)}$  transformed. To account for violations of the sphericity  
116 assumption of variances, the Greenhouse–Geisser correction was applied to the  
117 degrees of freedom.

118

119 Results

120 The extracts from young leaves induced worker recruitment by  
121 *A. decemarticulatus* in the first few minutes after being presented (i.e., a significant  
122 time effect, Table S1). Note that the time effect noted in the other experiments (i.e.,  
123 other leaf developmental stages) was related to a loss of interest in the filter papers  
124 during the course of the trials.

125 The compounds identified in the leaf extracts were mainly linear hydrocarbons  
126 (69.9% and 98.7% in young and old leaves, respectively) (Table S2). Young leaves  
127 showed a more diversified profile than did old leaves with some triterpenes ( $\alpha$ -  
128 amyirin,  $\beta$ -amyirin and  $\alpha$ -amyrone), tocopherols ( $\alpha$ - and  $\beta$ -tocopherol), and an alcohol.  
129 Among the volatile compounds, only methyl salicylate was found in both young and  
130 old leaves.

131 The fractionation of the extracts according to the polarity of the compounds  
132 showed that only the dichloromethane fraction attracted *A. decemarticulatus* workers  
133 (Table S3). The GC-MS analysis of compounds in the different fractions showed that  
134  $\alpha$ -tocopherol was the only compound present in all of the active fractions (i.e.,  
135 dichloromethane and young leaves) and absent from all of the inactive fractions (i.e.,  
136 old leaves, hexane and methanol fractions) (Table S3).  $\beta$ -tocopherol was present in all  
137 of the fractions but its proportion was relatively higher in the active dichloromethane  
138 fraction. Because of their quite similar molecular structures, both compounds were  
139 selected for behavioral tests.

140

141

142 **Table S1.** Repeated-measures ANOVAs examining the ability of extracts  
 143 from *H. physophora* leaves to attract *A. decemarticulatus* and *A. octoarticulatus*  
 144 according to leaf developmental stage (1-4). Probabilities corrected for sphericity are  
 145 provided using the Greenhouse–Geisser correction (G-G). Significant results are  
 146 indicated in bold.  
 147

|                           | <i>A. decemarticulatus</i> |          |                  |                  | <i>A. octoarticulatus</i> |          |                  |                  |
|---------------------------|----------------------------|----------|------------------|------------------|---------------------------|----------|------------------|------------------|
|                           | <i>df</i>                  | <b>F</b> | <i>p</i> -value  | G-G              | <i>df</i>                 | <b>F</b> | <i>p</i> -value  | G-G              |
| <b>Stage 1 vs. hexane</b> |                            |          |                  |                  |                           |          |                  |                  |
| Treatment                 | 1                          | 44.66    | <b>&lt;0.001</b> |                  | 1                         | 3.61     | 0.065            |                  |
| Error                     | 38                         |          |                  |                  | 38                        |          |                  |                  |
| Time                      | 19                         | 3.55     | <b>&lt;0.001</b> | <b>&lt;0.001</b> | 19                        | 2.84     | <b>&lt;0.001</b> | <b>0.001</b>     |
| Time x Treatment          | 19                         | 1.66     | 0.039            | 0.095            | 19                        | 0.73     | 0.787            | 0.722            |
| Error                     | 722                        |          |                  |                  | 722                       |          |                  |                  |
| <b>Stage 2 vs. hexane</b> |                            |          |                  |                  |                           |          |                  |                  |
| Treatment                 | 1                          | 0.71     | 0.405            |                  | 1                         | 1.14     | 0.292            |                  |
| Error                     | 38                         |          |                  |                  | 38                        |          |                  |                  |
| Time                      | 19                         | 3.68     | <b>&lt;0.001</b> | <b>&lt;0.001</b> | 19                        | 3.29     | <b>&lt;0.001</b> | <b>0.001</b>     |
| Time x Treatment          | 19                         | 1.44     | 0.101            | 0.155            | 19                        | 1.12     | 0.326            | 0.348            |
| Error                     | 722                        |          |                  |                  | 722                       |          |                  |                  |
| <b>Stage 3 vs. hexane</b> |                            |          |                  |                  |                           |          |                  |                  |
| Treatment                 | 1                          | 1.73     | 0.197            |                  | 1                         | 1.32     | 0.258            |                  |
| Error                     | 38                         |          |                  |                  | 38                        |          |                  |                  |
| Time                      | 19                         | 0.90     | 0.587            | 0.540            | 19                        | 2.42     | <b>0.001</b>     | <b>0.005</b>     |
| Time x Treatment          | 19                         | 0.50     | 0.965            | 0.900            | 19                        | 1.50     | 0.079            | 0.124            |
| Error                     | 722                        |          |                  |                  | 722                       |          |                  |                  |
| <b>Stage 4 vs. hexane</b> |                            |          |                  |                  |                           |          |                  |                  |
| Treatment                 | 1                          | 0.92     | 0.345            |                  | 1                         | 1.44     | 0.237            |                  |
| Error                     | 38                         |          |                  |                  | 38                        |          |                  |                  |
| Time                      | 19                         | 1.10     | 0.344            | 0.359            | 19                        | 4.94     | <b>&lt;0.001</b> | <b>&lt;0.001</b> |
| Time x Treatment          | 19                         | 1.13     | 0.316            | 0.338            | 19                        | 0.91     | 0.574            | 0.536            |
| Error                     | 722                        |          |                  |                  | 722                       |          |                  |                  |

148

149 **Table S2.** Retention index, identification and relative proportion of the compounds in extracts from young and old *H. physophora* leaves and  
 150 their fractions. tr: traces (<0.1%), Unk: unknown, - : absent. Fractions that attracted *A. decemarticulatus* are in bold.  
 151

| Peak | Retention index | Identification                                | Leaves      |      | Fractions (young leaves) |        |                 |          |
|------|-----------------|-----------------------------------------------|-------------|------|--------------------------|--------|-----------------|----------|
|      |                 |                                               | Young       | Old  | Evaporated               | Hexane | Dichloromethane | Methanol |
| 1    | 1207            | Methyl salicylate                             | <b>0.2</b>  | 0.2  | <b>tr</b>                | tr     | -               | -        |
| 2    | 2300            | n-Tricosane ( <i>n</i> -C <sub>23</sub> )     | <b>0.2</b>  | tr   | <b>0.1</b>               | 0.3    | <b>0.1</b>      | 0.3      |
| 3    | 2500            | n-Pentacosane ( <i>n</i> -C <sub>25</sub> )   | <b>4.1</b>  | 0.1  | <b>2.4</b>               | 0.6    | <b>0.1</b>      | 0.2      |
| 4    | 2600            | n-Hexacosane ( <i>n</i> -C <sub>26</sub> )    | <b>0.5</b>  | tr   | <b>0.4</b>               | 0.8    | <b>tr</b>       | -        |
| 5    | 2641            | Unk.                                          | <b>0.3</b>  | tr   | <b>0.2</b>               | 0.2    | <b>0.5</b>      | -        |
| 6    | 2700            | n-Heptacosane ( <i>n</i> -C <sub>27</sub> )   | <b>4.1</b>  | 0.1  | <b>3.4</b>               | 6.3    | -               | -        |
| 7    | 2704            | Unk. polar                                    | <b>1.5</b>  | -    | <b>1.1</b>               | -      | <b>5.9</b>      | 8.4      |
| 8    | 2800            | n-Octacosane ( <i>n</i> -C <sub>28</sub> )    | <b>1.4</b>  | -    | <b>0.9</b>               | 1.2    | -               | -        |
| 9    | 2805            | Unk. polar                                    | <b>0.7</b>  | -    | <b>0.5</b>               | -      | <b>2.2</b>      | 2.7      |
| 10   | 2845            | Unk.                                          | <b>0.6</b>  | 0.1  | <b>0.2</b>               | 0.1    | <b>1.7</b>      | -        |
| 11   | 2900            | n-Nonacosane ( <i>n</i> -C <sub>29</sub> )    | <b>19.1</b> | 10.0 | <b>20.1</b>              | 19.5   | -               | -        |
| 12   | 2910            | Heptacosan-2-ol                               | <b>18.2</b> | -    | <b>14.4</b>              | -      | <b>57.1</b>     | 65.1     |
| 13   | 3000            | n-Triacontane ( <i>n</i> -C <sub>30</sub> )   | <b>2.8</b>  | 1.5  | <b>4.1</b>               | 5.0    | -               | -        |
| 14   | 3077            | β-tocopherol                                  | <b>4.7</b>  | 0.2  | <b>2.0</b>               | 0.2    | <b>19.5</b>     | 1.6      |
| 15   | 3100            | n-Entriacontane ( <i>n</i> -C <sub>31</sub> ) | <b>30.2</b> | 56.5 | <b>37.7</b>              | 52.4   | -               | -        |
| 16   | 3155            | α-tocopherol                                  | <b>0.8</b>  | -    | <b>0.7</b>               | -      | <b>4.3</b>      | tr       |
| 17   | 3200            | n-Dotriacontane( <i>n</i> -C <sub>32</sub> )  | <b>1.5</b>  | 4.1  | <b>1.9</b>               | 2.7    | <b>tr</b>       | -        |
| 18   | 3300            | n-Tritriacontane( <i>n</i> -C <sub>33</sub> ) | <b>5.7</b>  | 26.4 | <b>7.7</b>               | 10.7   | -               | -        |
| 19   | 3438            | β-amyrin                                      | <b>1.4</b>  | -    | <b>1.1</b>               | -      | <b>3.3</b>      | 11       |
| 20   | 3455            | α-amyrone                                     | <b>0.4</b>  | 0.7  | -                        | -      | <b>2.1</b>      | -        |
| 21   | 3484            | α-amyrin                                      | <b>0.8</b>  | -    | <b>0.7</b>               | -      | <b>1.7</b>      | 5.6      |
| 22   | 3572            | Unk. polar                                    | <b>0.7</b>  | -    | <b>0.3</b>               | -      | <b>1.4</b>      | 5.1      |

152 **Table S3.** Repeated-measures ANOVAs examining the attractiveness for *A.*  
 153 *decemarticulatus* of fractions of extracts from young *H. physophora* leaves.  
 154 Probabilities corrected for sphericity are provided using the Greenhouse–Geisser  
 155 correction (G-G). Significant results are indicated in bold.  
 156

|                                            | <i>df</i> | <b>F</b> | <i>p</i> -value  | G-G   |
|--------------------------------------------|-----------|----------|------------------|-------|
| <b>Evaporated vs. hexane</b>               |           |          |                  |       |
| Treatment                                  | 1         | 63.85    | <b>&lt;0.001</b> |       |
| Error                                      | 38        |          |                  |       |
| Time                                       | 19        | 0.55     | 0.941            | 0.869 |
| Time x Treatment                           | 19        | 0.77     | 0.744            | 0.669 |
| Error                                      | 722       |          |                  |       |
| <b>Hexane fraction vs. hexane</b>          |           |          |                  |       |
| Treatment                                  | 1         | 0.22     | 0.623            |       |
| Error                                      | 38        |          |                  |       |
| Time                                       | 19        | 1.56     | 0.061            | 0.113 |
| Time x Treatment                           | 19        | 0.95     | 0.513            | 0.485 |
| Error                                      | 722       |          |                  |       |
| <b>Dichloromethane fraction vs. hexane</b> |           |          |                  |       |
| Treatment                                  | 1         | 154.32   | <b>&lt;0.001</b> |       |
| Error                                      | 38        |          |                  |       |
| Time                                       | 19        | 0.79     | 0.725            | 0.659 |
| Time x Treatment                           | 19        | 0.70     | 0.819            | 0.744 |
| Error                                      | 722       |          |                  |       |
| <b>Methanol fraction vs. hexane</b>        |           |          |                  |       |
| Treatment                                  | 1         | 0.96     | 0.334            |       |
| Error                                      | 38        |          |                  |       |
| Time                                       | 19        | 1.33     | 0.153            | 0.209 |
| Time x Treatment                           | 19        | 0.58     | 0.923            | 0.834 |
| Error                                      | 722       |          |                  |       |

157

158



159 **Table S4.** Repeated-measures ANOVAs examining the ability of synthetic  
 160 tocopherols and their mixture with extracts from old leaves (EOL) to attract  
 161 *A. decemarticulatus*. Probabilities corrected for sphericity are provided using the  
 162 Greenhouse–Geisser correction (G-G). In bold: significant results.  
 163

|                                                                | <i>df</i> | F     | <i>p</i> -value  | G-G              |
|----------------------------------------------------------------|-----------|-------|------------------|------------------|
| <b><i>α</i>- and <i>β</i>-tocopherols mix vs. hexane</b>       |           |       |                  |                  |
| Treatment                                                      | 1         | 2.07  | 0.158            |                  |
| Error                                                          | 38        |       |                  |                  |
| Time                                                           | 19        | 1.02  | 0.440            | 0.427            |
| Time x Treatment                                               | 19        | 0.82  | 0.682            | 0.598            |
| Error                                                          | 722       |       |                  |                  |
| <b><i>α</i>- and <i>β</i>-tocopherols + EOL mix vs. hexane</b> |           |       |                  |                  |
| Treatment                                                      | 1         | 43.14 | <b>&lt;0.001</b> |                  |
| Error                                                          | 38        |       |                  |                  |
| Time                                                           | 19        | 1.68  | <b>0.035</b>     | 0.088            |
| Time x Treatment                                               | 19        | 3.11  | <b>&lt;0.001</b> | <b>0.001</b>     |
| Error                                                          | 722       |       |                  |                  |
| <b><i>α</i>-tocopherol + EOL mix vs. hexane</b>                |           |       |                  |                  |
| Treatment                                                      | 1         | 7.07  | <b>0.011</b>     |                  |
| Error                                                          | 38        |       |                  |                  |
| Time                                                           | 19        | 2.12  | <b>0.004</b>     | <b>0.041</b>     |
| Time x Treatment                                               | 19        | 0.67  | 0.847            | 0.696            |
| Error                                                          | 722       |       |                  |                  |
| <b><i>β</i>-tocopherol + EOL mix vs. hexane</b>                |           |       |                  |                  |
| Treatment                                                      | 1         | 2.48  | 0.124            |                  |
| Error                                                          | 38        |       |                  |                  |
| Time                                                           | 19        | 4.89  | <b>&lt;0.001</b> | <b>&lt;0.001</b> |
| Time x Treatment                                               | 19        | 0.60  | 0.911            | 0.757            |
| Error                                                          | 722       |       |                  |                  |

164  
 165

## 166 Nutrient transfer via <sup>15</sup>N labeling

### 167 Methods

168 We investigated the role of the two mutualistic ant species in myrmecotrophy by  
 169 providing the ants with food artificially enriched in <sup>15</sup>N. This experiment was  
 170 performed on neighboring plant individuals inhabited by either *A. decemarticulatus* or  
 171 *A. octoarticulatus* from the MdS population to avoid site-related variations in isotopic  
 172 signatures. Isotopic labeling was performed using agar discs (ca. 5 mm diameter;  
 173 mean weight ± SE: 111 ± 17 mg) containing 2% of enriched glycine (99 atom%  
 174 <sup>15</sup>NH<sub>2</sub>CH<sub>2</sub>COOH), 3% of non-enriched peptone, 15% of non-enriched fructose and  
 175 4% of agar. The agar discs were placed in plastic cups wired to the base of the plant,  
 176 just besides the first basal branching. No direct contact occurred between the <sup>15</sup>N-  
 177 enriched food and the plant or the galleries. The plastic cups were sealed with tapped  
 178 caps to keep out food-robbing insects and a small hole facing the host plant stem was  
 179 made to provide access to the ants. The plastic cups were placed 10 days prior to the

180 beginning of experiment to allow the ants to adapt to the setup. The ants were fed  
181 with <sup>15</sup>N-enriched food each day for 9 consecutive days. Before re-supplying each  
182 colony with a new, predefined quantity of agar discs, we removed any remaining food  
183 and weighed it in order to determine the total food consumption by the ant colonies.

184 Ant, plant and fungal samples were collected one month after the end of the  
185 experiment. The youngest leaf was harvested from each plant and a 4-cm<sup>2</sup> piece of the  
186 lamina was dissected although the main nerve was spared. The ants sheltering in the  
187 domatia were also collected. Fungal samples were not collected directly from the  
188 galleries to avoid any bias as the latter are not constituted of pure fungus and also  
189 because the two ant species do not build similar galleries in terms of composition and  
190 structure. Pure fungal samples were collected as described in Ruiz-González *et al.*  
191 [12]. Briefly, sampling consisted of making a cut of ca. 5mm<sup>2</sup> in the domatia walls of  
192 the six youngest, mature leaves and waiting for the ants to fill it with pure fungus.  
193 Cuts were made 2 days after the end of the enrichment procedure.

194 To quantify the %N, %C, δ<sup>15</sup>N and δ<sup>13</sup>C contents of the three partners, all of the  
195 samples collected were vacuum-dried and around 5 mg of each were analyzed. Stable  
196 isotope analyses were conducted at the Colorado Plateau Stable Isotope Laboratory  
197 (Northern Arizona University, USA) using a Thermo-Finnigan Delta<sup>Plus</sup> Advantage  
198 gas isotope-ratio mass spectrophotometer (ThermoFisher Scientific) interfaced with a  
199 Costech Analytical ECS4010 elemental analyzer.

200 δ<sup>15</sup>N and δ<sup>13</sup>C were calculated as follows:

$$\delta X = (R_{\text{sample}}/R_{\text{standard}} - 1) \times 1.000$$

201  
202 where X is the element of interest, and R<sub>sample</sub> and R<sub>standard</sub> are the molecular  
203 ratios (i.e., <sup>13</sup>C/<sup>12</sup>C or <sup>15</sup>N/<sup>14</sup>N) of the sample and the standard, respectively [13]. The  
204 carbon and nitrogen contents (%N and %C) were quantified in the negative controls  
205 for the three partners by calculating the ratio between the mass of carbon or nitrogen  
206 atoms and the total mass of the dried sample.

207

## 208 Results

209 The provisioning of the ants with <sup>15</sup>N-enriched food resulted in a significant  
210 increase in δ<sup>15</sup>N for all three associated partners compared to the negative controls  
211 (Fig. S2). The <sup>15</sup>N enrichments of the ants and the fungus were of the same magnitude  
212 (*A. decemarticulatus* vs. fungus: MW, *U* = 37, *p* = 0.645; *A. octoarticulatus* vs.

213 fungus: MW,  $U = 26$ ,  $p = 0.901$ ). On the contrary, the  $^{15}\text{N}$  enrichments of the plants  
 214 were significantly lower compared to both the ants and the fungus  
 215 (*A. decemarticulatus*: ant vs. plant: MW,  $U = 52$ ,  $p < 0.05$ , fungus vs. plant: MW,  $U =$   
 216  $61$ ,  $p < 0.01$ ; *A. octoarticulatus*: ants vs. plant: MW,  $U = 46$ ,  $p < 0.05$ , fungus vs.  
 217 plant:  $U = 46$ ,  $p < 0.05$ ). The comparison of the two systems also showed no  
 218 significant differences in  $^{15}\text{N}$  translocation between the ants, the fungus and the  
 219 plants, demonstrating a similar functioning in the two associations  
 220 (*A. decemarticulatus* vs. *A. octoarticulatus*: MW,  $U = 23$ ,  $p = 0.612$ ;  
 221 *A. decemarticulatus*- vs. *A. octoarticulatus*-associated fungus: MW,  $U = 16$ ,  $p = 0.189$ ;  
 222 *A. decemarticulatus*- vs. *A. octoarticulatus*-associated plants: MW,  $U = 24$ ,  $p =$   
 223  $0.694$ ).

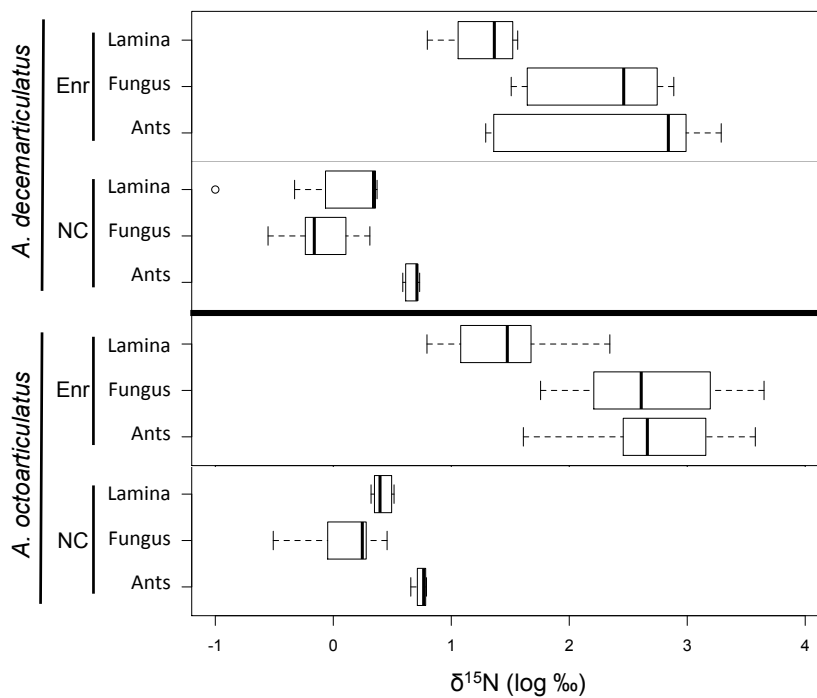

224  
 225

226 **Figure S2.** Effect of experimental  $^{15}\text{N}$  provisioning to the ants on the three partners in  
 227 the two model systems.  $\delta^{15}\text{N}$  ( $\log \text{‰}$ ) values of the three partners are shown for the  
 228 two treatments: Negative control (NC) or ant  $^{15}\text{N}$ -enriched food (Enr). The two  
 229 species of ants, *Allomerus decemarticulatus* and *A. octoarticulatus*, were provisioned  
 230 during 9 consecutive days with agar discs containing 2% of 99 atom%  $^{15}\text{N}$ -glycine.  
 231 Box and whisker plots represent, top to bottom, the 90<sup>th</sup> percentile, 75<sup>th</sup> percentile,  
 232 median, 25<sup>th</sup> percentile, and 10<sup>th</sup> percentile and open circles indicate outliers.

233

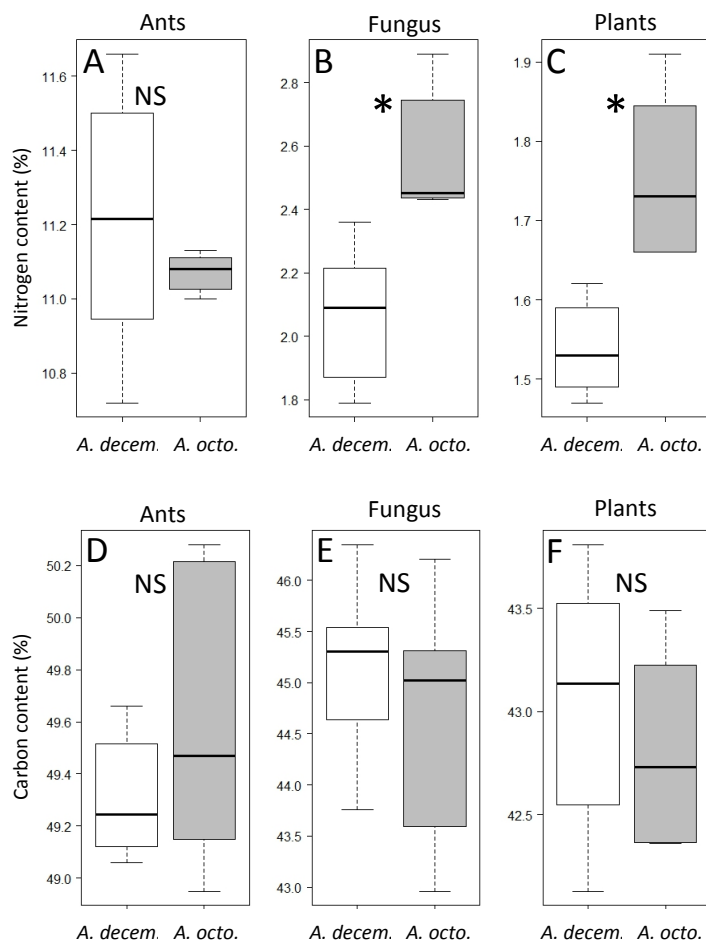

234

235 **Figure S3.** Nitrogen (A-C) and Carbon (D-F) contents of the three associated  
 236 partners. **A, D** are the comparisons between the two ant species,  
 237 *Allomerus decemarticulatus* and *A. octoarticulatus*; **B, E** are for the ant-associated  
 238 fungus and **C, D** for *Hirtella physophora*. Box and whisker plots represent, top to  
 239 bottom, the 90<sup>th</sup> percentile, 75<sup>th</sup> percentile, median, 25<sup>th</sup> percentile, and 10<sup>th</sup>  
 240 percentile and open circles indicate outliers. ‘NS’ or asterisks indicate the absence or presence of  
 241 a significant difference between species, respectively.  
 242

243 **References**

244 [1] Folmer, O., Black, M., Hoeh, W., Lutz, R. & Vrijenhoek, R. 1994 DNA primers  
 245 for amplification of mitochondrial cytochrome c oxidase subunit I from diverse  
 246 metazoan invertebrates. *Mol. Mar. Biol. Biotechnol.* **3**, 294-299.  
 247 [2] Crozier, Y.C., Koulianos, S. & Crozier, R.H. 1991 An improved test for  
 248 Africanized honeybee mitochondrial DNA. *Experientia* **47**, 968-969.  
 249 [3] Jermini, L.S. & Crozier, R.H. 1994 The cytochrome b region in the mitochondrial  
 250 DNA of the ant *Tetraponera rufoniger*: sequence divergence in hymenoptera may  
 251 be associated with nucleotide content. *Journal of Molecular Evolution* **38**, 282-  
 252 294.  
 253 [4] Kearse, M., Moir, R., Wilson, A., Stones-Havas, S., Cheung, M., Sturrock, S.,  
 254 Buxton, S., Cooper, A., Markowitz, S., Duran, C., et al. 2012 Geneious Basic: an  
 255 integrated and extendable desktop software platform for the organization and

- 256 analysis of sequence data. *Bioinformatics* **28**, 1647-1649.  
257 (doi:10.1093/bioinformatics/bts199).
- 258 [5] Katoh, K., Misawa, K., Kuma, K. & Miyata, T. 2002 MAFFT: a novel method for  
259 rapid multiple sequence alignment based on fast Fourier transformation. *Nucleic  
260 Acids Research* **14**, 3059-3066.
- 261 [6] Stamatakis, A. 2006 RAxML-VI-HPC: maximum likelihood-based phylogenetic  
262 analyses with thousands of taxa and mixed models. *Bioinformatics* **22**, 2688-  
263 2690. (doi:10.1093/bioinformatics/btl446).
- 264 [7] Arauco, R.A., Iannaccone, J.O., Edwards, D.P. & Yu, D.W. 2006 Mediación  
265 química entre *Allomerus demerarae* Wheeler, 1935 (Hymenoptera: Formicidae) y  
266 *Cordia nodosa* Lam. (Boraginaceae). *Rev. Colomb. Entomol.* **32**, 85-92.
- 267 [8] Edwards, D.P., Arauco, R., Hassall, M., Sutherland, W.J., Chamberlain, W.J.,  
268 Wadhams, L.J. & Yu, D.W. 2007 Protection in an ant-plant mutualism: an  
269 adaptation or a sensory trap? *Anim. Behav.* **74**, 377-385.  
270 (doi:10.1016/j.anbehav.2006.07.022).
- 271 [9] Grangier, J., Dejean, A., Malé, P.J.G. & Orivel, J. 2008 Indirect defense in a  
272 highly specific ant-plant mutualism. *Naturwissenschaften* **96**, 57-63.  
273 (doi:10.1007/s00114-008-0398-4).
- 274 [10] Bergström, G., Applegren, M., Borg-Karlson, A.K., Groth, I. & Strömberg, S.  
275 1980 Studies on natural odoriferous compounds XXII. Techniques for the  
276 isolation/enrichment of plant volatiles in the analyses of *Ophrys* orchids  
277 (Orchidaceae). *Chem. Scripta* **16**, 173-180.
- 278 [11] Brouat, C., McKey, D.B., Bessière, J.M., Pascal, L. & Hossaert-McKey, M. 2000  
279 Leaf volatile compounds and the distribution of ant patrolling in an ant-plant  
280 protection mutualism: preliminary results on *Leonardoxa* (Fabaceae:  
281 Caesalpinioideae) and *Petalomyrmex* (Formicidae: Formicinae). *Acta Oecol.* **21**,  
282 349-357. (doi:10.1016/S1146-609X(00)01091-2).
- 283 [12] Ruiz-González, M.X., Malé, P.J.G., Leroy, C., Dejean, A., Gryta, H., Jargeat, P.,  
284 Quilichini, A. & Orivel, J. 2011 Specific, non-nutritional association between an  
285 ascomycete fungus and *Allomerus* plant-ants. *Biol. Lett.* **7**, 475-479.  
286 (doi:10.1098/rsbl.2010.0920).
- 287 [13] DeNiro, M.J. & Epstein, S. 1978 Influence of diet on the distribution of nitrogen  
288 isotopes in animals. *Geochim. Cosmochim. Ac.* **42**, 495-506. (doi:10.1016/0016-  
289 7037(81)90244-1).
- 290
